# Supplementary material
Source: publisher site journal article supplement (https://www.spandidos-publications.com/4984/downloadSupplementary)
Supplement: Supplementary file 1 [file downloadSupplementary]

**Table SI.** KEGG pathways based on target-mRNAs identified with lncAdeep.

| <b>Anesthetic</b> | <b>KEGG pathways</b>                         |
|-------------------|----------------------------------------------|
| VAG               | Graft-versus-host disease                    |
| TIVA              | Cardiac muscle contraction                   |
|                   | Intestinal immune network for IgA production |
|                   | Melanoma                                     |
|                   | Pertussis                                    |
|                   | Phototransduction                            |
|                   | Prion diseases                               |
|                   | Purine metabolism                            |
|                   | Pyrimidine metabolism                        |
|                   | Rap1 signaling pathway                       |
|                   | Salivary secretion                           |
|                   | Sphingolipid metabolism                      |
|                   | Taurine and hypotaurine metabolism           |
|                   | Tryptophan metabolism                        |
|                   | Tyrosine metabolism                          |

KEGG, Kyoto Encyclopedia of Genes and Genomes; VAG, volatile anesthetic gas; TIVA, total intravenous anesthesia; Rap1, Ras-related protein 1.
